# Supplementary material
Source: PubMed Central journal article supplement (PMC6636927)
Supplement: NIHMS989387-supplement-Supp_figS1-2.pdf [file NIHMS989387-supplement-Supp_figS1-2.pdf]

# **Partial Enzymatic Reactions: A Missed Opportunity in Proteomics Research**

Jingren Deng, Morgan H. Julian and Iulia M. Lazar\*

Department of Biological Sciences, Virginia Tech  
1981 Kraft Drive, Blacksburg, VA 24061, USA

**\*Correspondence:** Iulia M. Lazar  
**E-mail:** [malazar@vt.edu](mailto:malazar@vt.edu)

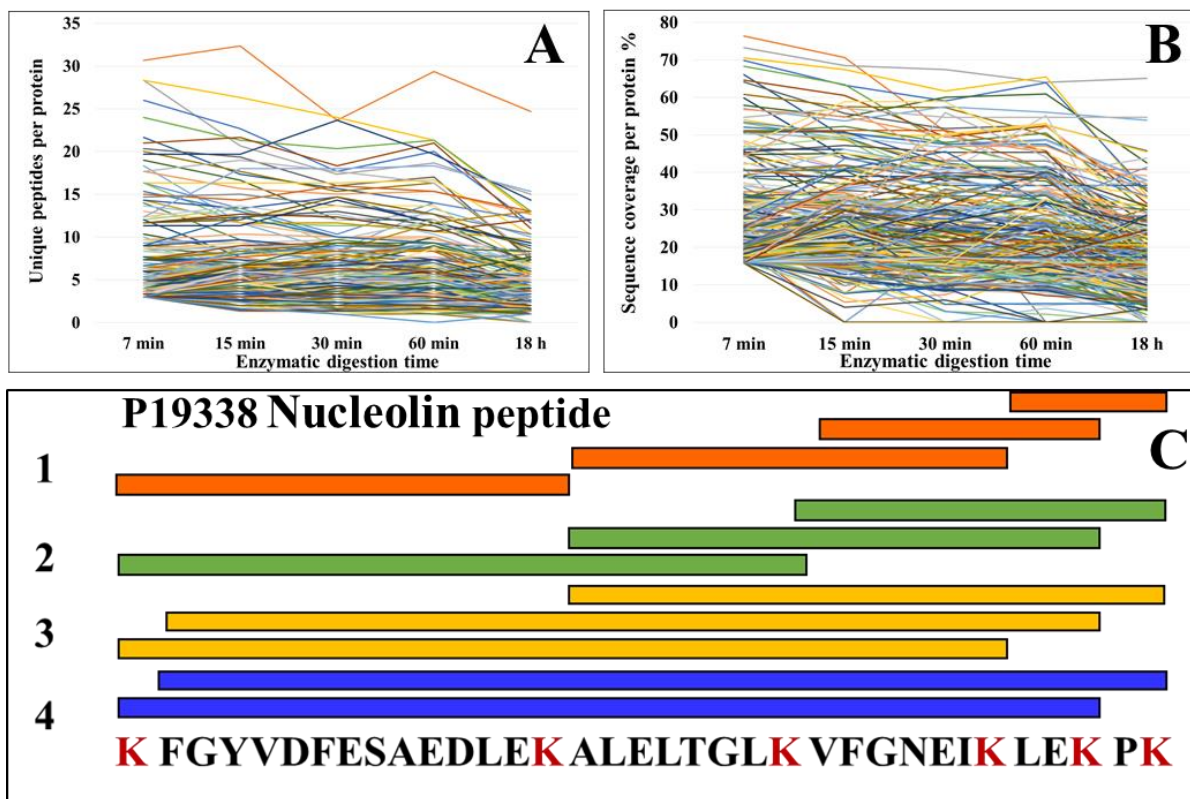

**Supplemental Figure 1.** Drop in the number of (A) unique peptides and (B) sequence coverage per protein with the increase in proteolytic digestion time. Results are shown for the top 250 proteins, matched by the largest number of unique peptides, from the 7 min experiment. (C) Depiction of possible tryptic peptides generated from a larger nucleolin (P19338) peptide with 5 missed cleavage sites. The number of missed cleavages in each subset of peptides is indicated on the left.

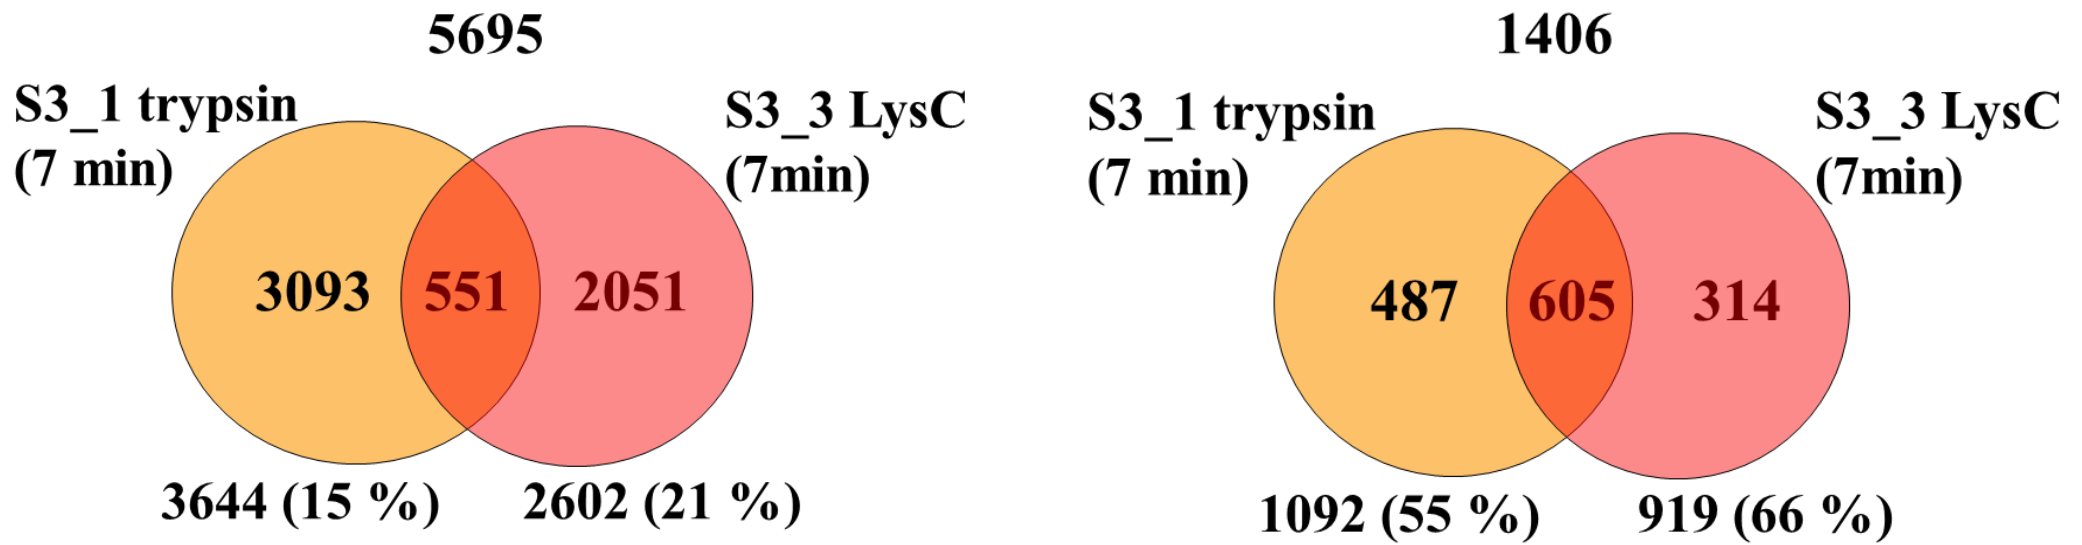

**Supplemental Figure 2.** Venn diagram of overlapping peptides and proteins in combined tryptic and Lys-C enzymatic digestions (7 min).
